# Supplementary material for: Understanding the Metabolism of Proteolysis Targeting Chimeras (PROTACs): The Next Step toward Pharmaceutical Applications
Source: PubMed Central journal article supplement (PMC8015227; doi:10.1021/acs.jmedchem.0c00793), 2020-10-07
Supplement: jm0c00793_si_001.pdf [file jm0c00793_si_001.pdf]

## Supporting Information

# Understanding the metabolism of Proteolysis Targeting Chimeras (PROTACs): the next step toward pharmaceutical applications

Laura Goracci,<sup>a‡</sup> Jenny Desantis,<sup>a‡</sup> Aurora Valeri,<sup>b</sup> Beatrice Castellani,<sup>a</sup> Michela Eleuteri,<sup>c</sup> Gabriele Cruciani<sup>a\*</sup>

<sup>a</sup>*Department of Chemistry, Biology and Biotechnology, University of Perugia, 06123 Perugia, Italy;*

<sup>b</sup>*Molecular Horizon, srl, Bettona 06084, Italy.*

<sup>c</sup>*Montelino Therapeutics, LLC,.7 Powdermill Lane, Southborough, MA 01772.*

### Table of Contents

|                                                                                                                                                                                  |        |
|----------------------------------------------------------------------------------------------------------------------------------------------------------------------------------|--------|
| <b>Table S1.</b> PROTACs t <sub>1/2</sub> values upon human hepatocytes incubation.                                                                                              | S2-S4  |
| <b>Table S2.</b> Free ligands t <sub>1/2</sub> values upon human hepatocytes incubation.                                                                                         | S5     |
| <b>Table S3.</b> Metabolism identification data.                                                                                                                                 | S6-S12 |
| <b>Figure S1.</b> Metabolic profile for compound <b>7 (MZ1)</b> .                                                                                                                | S13    |
| <b>Figure S2.</b> Kinetics of the metabolism of compounds <b>33</b> and <b>34</b> in human liver cytosol.                                                                        | S14    |
| <b>Figure S3.</b> Chromatogram and MS/MS spectra of compounds <b>33</b> and <b>34</b> after incubation in human liver cytosol in the absence and in the presence of hydralazine. | S15    |

**Table S1.** PROTACs' chemical structures and half-life values (t1/2) upon incubation in cryopreserved human hepatocytes.

| Structure                                                                           | Entry                         | R                                                                                   |                                                                                       | t1/2 (min) |
|-------------------------------------------------------------------------------------|-------------------------------|-------------------------------------------------------------------------------------|---------------------------------------------------------------------------------------|------------|
|                                                                                     |                               | Linker                                                                              | E3 ligase ligand                                                                      |            |
| 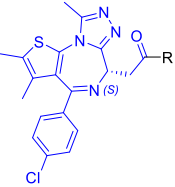   | <b>1</b><br><b>(dBet1)</b>    |    |    | 135        |
|                                                                                     | <b>2</b><br><b>(dBet6)</b>    |    | "                                                                                     | 18.2       |
|                                                                                     | <b>3</b><br><b>(ARV-825)</b>  |    |    | 27.7       |
|                                                                                     | <b>4</b>                      |    | "                                                                                     | 55.1       |
|                                                                                     | <b>5</b>                      |    | "                                                                                     | 49.4       |
|                                                                                     | <b>6</b>                      |    | "                                                                                     | 87.0       |
|    | <b>7</b><br><b>(MZ1)</b>      |    |    | 210        |
|                                                                                     | <b>8</b>                      |  |   | 81.8       |
|                                                                                     | <b>9</b>                      |  | "                                                                                     | 137        |
|                                                                                     | <b>10</b><br><b>(ARV-771)</b> |  | "                                                                                     | 151        |
|                                                                                     | <b>11</b>                     |  | "                                                                                     | >>240      |
|  | <b>12</b>                     |  |  | 41.4       |
|                                                                                     | <b>13</b>                     |  | "                                                                                     | 33.6       |
|                                                                                     | <b>14</b>                     |  | "                                                                                     | 76.8       |
|                                                                                     | <b>15</b>                     |  |  | 26.8       |
|                                                                                     | <b>16</b>                     |  | "                                                                                     | 34.7       |

|                                                                                     |                                                                                                                                                                                                                                                                                                                                                                                                                                                                                                                                                                                                                                                                                   |                                                                                                                                                                                                                                        |                                                                                    |
|-------------------------------------------------------------------------------------|-----------------------------------------------------------------------------------------------------------------------------------------------------------------------------------------------------------------------------------------------------------------------------------------------------------------------------------------------------------------------------------------------------------------------------------------------------------------------------------------------------------------------------------------------------------------------------------------------------------------------------------------------------------------------------------|----------------------------------------------------------------------------------------------------------------------------------------------------------------------------------------------------------------------------------------|------------------------------------------------------------------------------------|
|                                                                                     | <p>17 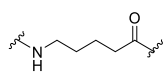</p> <p>18 </p> <p>19 </p> <p>20 </p>                                                                                                                                                                                                                                                                                                   | <p></p> <p>"</p> <p>"</p> <p>"</p>                                                                                                                  | <p>204</p> <p>209</p> <p>159</p> <p>218</p>                                        |
|    | <p>21 </p> <p>22 </p> <p>23 </p> <p>24 </p> <p>25 </p>                                                                                                                                                                                                    | <p></p> <p></p> <p>"</p> <p>"</p> <p>"</p>                       | <p>15.7</p> <p>95</p> <p>91.2</p> <p>&gt;&gt;240</p> <p>&gt;&gt;240</p>            |
|  | <p>26 </p> <p>27 </p> <p>28 </p> <p>29 </p> <p>30 </p> <p>31 </p> <p>32 </p> | <p></p> <p>"</p> <p>"</p> <p></p> <p>"</p> <p>"</p> <p>"</p> | <p>8.4</p> <p>39.4</p> <p>66.4</p> <p>53.5</p> <p>47.6</p> <p>38.4</p> <p>45.3</p> |

|    |                                                                                   |                                                                                      |      |
|----|-----------------------------------------------------------------------------------|--------------------------------------------------------------------------------------|------|
| 33 | 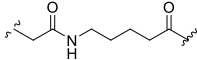 |   | 74.3 |
| 34 |  | "                                                                                    | 86.1 |
| 35 |  | "                                                                                    | 25   |
| 36 |  | "                                                                                    | 25.2 |
| 37 |  | "                                                                                    | 37.6 |
| 38 |  | "                                                                                    | 67.6 |
| 39 |  | "                                                                                    | 40.1 |
| 40 |  |  | 66.7 |

**Table S2.** Structure and half-life values (t1/2) of the free ligands upon incubation in cryopreserved human hepatocytes.

| Entry                                   | Structure | t1/2 (min) |
|-----------------------------------------|-----------|------------|
| <b>41</b><br><b>(pomalidomide)</b>      |           | 140        |
| <b>42</b><br><b>(VHL ligand)</b>        |           | 92         |
| <b>43</b><br><b>((+)-JQ1)</b>           |           | >>240      |
| <b>44</b><br><b>(CX4945)</b>            |           | 99.7       |
| <b>45</b><br><b>(Olaparib-analogue)</b> |           | >>240      |
| <b>46</b><br><b>(AR ligand)</b>         |           | 18.3       |

**Table S3.** Metabolism upon incubation in cryopreserved human hepatocytes, including the parent compounds (cp), their metabolites (Met ID), the underlying biotransformation, retention time (RT), chemical formula, accurate mass of the precursor [M+H]<sup>+</sup> and the most informative MS/MS fragments (a-e).

| cp | Met. ID | Biotransformation       | RT (min) | Formula                           | M+H <sup>+</sup> | a        | b        | c        | d        | e        |
|----|---------|-------------------------|----------|-----------------------------------|------------------|----------|----------|----------|----------|----------|
| 1  |         |                         | 7.11     |                                   |                  |          |          |          |          |          |
|    | M+16    | Aliphatic Hydroxylation | 6.17     | [C38H37CIN8O8S+H] <sup>+</sup>    | 801.2225         | 399.0687 | 287.0668 | 357.0575 | 176.0345 | -        |
|    | M+18    | Amide Hydrolysis        | 6.36     | [C38H39CIN8O8S+H] <sup>+</sup>    | 803.2354         | 675.1774 | 383.0720 | 341.0622 | 218.0741 | -        |
| 2  |         |                         | 7.93     |                                   |                  |          |          |          |          |          |
|    | M-509   | N-Dealkylation          | 4.15     | [C15H13N3O6+H] <sup>+</sup>       | 332.0884         | 287.0671 | 75.0240  | -        | -        | -        |
|    | M-441   | N-Dealkylation          | 6.59     | [C19H18CIN5OS+H] <sup>+</sup>     | 400.0995         | 383.0732 | 341.0628 | -        | -        | -        |
|    | M+18    | Amide Hydrolysis        | 7.06     | [C42H47CIN8O8S+H] <sup>+</sup>    | 859.3002         | 731.2382 | 383.0732 | 246.0705 | -        | -        |
|    | M+18    | Amide Hydrolysis        | 7.04     | [C42H47CIN8O8S+2H] <sup>++</sup>  | 430.1536         | 731.2446 | 366.1247 | 383.0717 | 527.2327 | 129.0661 |
|    | M-2     | Dehydrogenation         | 7.42     | [C42H43CIN8O7S+H] <sup>+</sup>    | 839.2748         | 383.0735 | 341.0631 | -        | -        | -        |
|    | M+16    | Aliphatic Hydroxylation | 7.41     | [C42H45CIN8O8S+H] <sup>+</sup>    | 857.2845         | 399.0685 | 357.0581 | 839.2729 | -        | -        |
| 3  |         |                         | 8.48     |                                   |                  |          |          |          |          |          |
|    | M-561   | O-Dealkylation          | 5.06     | [C17H19N3O6+H] <sup>+</sup>       | 362.1341         | 300.0979 | 251.1026 | 189.0657 | -        | -        |
|    | M-547   | O-Dealkylation          | 5.12     | [C17H17N3O7+H] <sup>+</sup>       | 376.1139         | 330.1084 | 300.0985 | 265.0819 | -        | -        |
|    | M-517   | O-Dealkylation          | 5.19     | [C19H23N3O7+H] <sup>+</sup>       | 406.1602         | 300.0979 | 344.1238 | 388.1503 | 362.1347 | -        |
|    | M-503   | O-Dealkylation          | 5.24     | [C19H21N3O8+H] <sup>+</sup>       | 420.1392         | 374.1347 | 300.0974 | 362.1334 | -        | -        |
|    | M-459   | O-Dealkylation          | 5.39     | [C21H25N3O9+H] <sup>+</sup>       | 464.1665         | 418.1609 | 300.0978 | 189.0661 | -        | -        |
|    | M-522   | Amide Hydrolysis        | 6.96     | [C19H17CIN4O2S+H] <sup>+</sup>    | 401.0827         | 383.0728 | 357.0935 | -        | -        | -        |
|    | M-373   | O-Dealkylation          | 7.28     | [C27H24CIN5O4S+H] <sup>+</sup>    | 550.1308         | 383.0728 | 341.0624 | 355.0781 | 152.0706 | -        |
|    | M-431   | O-Dealkylation          | 7.32     | [C25H22CIN5O2S+H] <sup>+</sup>    | 492.1258         | 383.0728 | 341.0622 | 152.0706 | -        | -        |
|    | M-387   | O-Dealkylation          | 7.33     | [C27H26CIN5O3S+H] <sup>+</sup>    | 536.1526         | 518.1412 | 383.0728 | 341.0628 | -        | -        |
|    | M-329   | O-Dealkylation          | 7.37     | [C29H28CIN5O5S+H] <sup>+</sup>    | 594.1584         | 341.0622 | 383.0735 | 152.0628 | -        | -        |
|    | M-285   | O-Dealkylation          | 7.43     | [C31H32CIN5O6S+H] <sup>+</sup>    | 638.1843         | 341.063  | 383.0715 | -        | -        | -        |
|    | M-241   | N-Dealkylation          | 7.47     | [C33H36CIN5O7S+H] <sup>+</sup>    | 682.2109         | 341.063  | 383.0715 | -        | -        | -        |
| 4  |         |                         | 9.00     |                                   |                  |          |          |          |          |          |
|    | M-383   | N-Dealkylation          | 6.58     | [C19H18CIN5OS+H] <sup>+</sup>     | 400.0985         | 383.0725 | 341.0622 | 289.0554 | 75.0237  | -        |
|    | M-241   | N-Dealkylation          | 7.49     | [C27H32CIN5O3S+H] <sup>+</sup>    | 542.1999         | 524.1907 | 341.0627 | 218.0753 | 383.0739 | -        |
|    | M+16    | Aliphatic Hydroxylation | 7.76     | [C40H43CIN8O6S+H] <sup>+</sup>    | 799.2796         | 341.0632 | 383.0736 | 314.0528 | 84.0818  | -        |
|    | M-2     | Dehydrogenation         | 8.30     | [C40H41CIN8O5S+H] <sup>+</sup>    | 781.2682         | 341.0628 | 86.0972  | 383.0727 | 60.0818  | -        |
| 5  |         |                         | 7.71     |                                   |                  |          |          |          |          |          |
|    | M-425   | O-Dealkylation          | 5.03     | [C17H19N3O6+H] <sup>+</sup>       | 362.1340         | 300.0976 | 251.1018 | 172.0391 | 189.0659 | -        |
|    | M-411   | O-Dealkylation+Ox       | 5.12     | [C17H17N3O7+H] <sup>+</sup>       | 376.1134         | 330.1082 | 358.1037 | 265.0820 | 300.0978 | 172.0392 |
|    | M-343   | O-Dealkylation          | 6.39     | [C21H22CIN5O2S+H] <sup>+</sup>    | 444.1254         | 426.1151 | 341.0622 | 246.0138 | 210.0378 | -        |
|    | M-329   | O-Dealkylation+Ox       | 6.42     | [C21H20CIN5O3S+H] <sup>+</sup>    | 458.1043         | 383.0725 | 289.0561 | -        | -        | -        |
|    | M-285   | O-Dealkylation+Ox       | 6.46     | [C23H24CIN5O4S+H] <sup>+</sup>    | 502.1303         | 383.0722 | 341.0609 | 75.0236  | -        | -        |
|    | M-241   | N-Dealkylation+Ox       | 6.54     | [C25H28CIN5O5S+H] <sup>+</sup>    | 546.1579         | 341.0627 | 314.0518 | 272.0291 | 246.0694 | -        |
|    | M+16    | Aliphatic Hydroxylation | 6.72     | [C38H39CIN8O8S+H] <sup>+</sup>    | 803.2354         | 357.0567 | 399.0675 | 172.0392 | 330.0463 | -        |
| 6  |         |                         | 5.96     |                                   |                  |          |          |          |          |          |
|    | M-493   | N-Dealkylation+Ox       | 5.08     | [C16H15N3O6+H] <sup>+</sup>       | 346.1033         | 175.0502 | -        | -        | -        | -        |
|    | M-241   | N-Dealkylation+Ox       | 5.16     | [C29H36CIN7O3S+2H] <sup>++</sup>  | 299.6217         | 383.0720 | 269.6112 | 139.1228 | 341.0622 | 199.1441 |
|    | M+16    | Aliphatic Hydroxylation | 5.17     | [C42H47CIN10O6S+2H] <sup>++</sup> | 428.1618         | 419.1539 | 399.0684 | 305.0492 | 291.6243 | 277.6086 |
|    | M+18    | Amide Hydrolysis        | 5.51     | [C42H49CIN10O6S+2H] <sup>++</sup> | 429.1696         | 440.1306 | 420.1643 | 383.0728 | 283.6268 | 127.1230 |
|    | M+16    | Aliphatic Hydroxylation | 5.61     | [C42H47CIN10O6S+2H] <sup>++</sup> | 428.1618         | 457.2558 | 542.2099 | 399.0677 | 291.6243 | 277.6086 |
|    | M-367   | N-Dealkylation+Ox       | 6.40     | [C22H22CIN5O3S+H] <sup>+</sup>    | 472.1184         | 383.0728 | 341.0622 | 314.0513 | 289.0542 | 218.0746 |
|    | M-439   | N-Dealkylation          | 6.42     | [C19H18CIN5OS+H] <sup>+</sup>     | 400.0992         | 383.0724 | 355.0782 | 289.0553 | -        | -        |
| 7  |         |                         | 7.74     |                                   |                  |          |          |          |          |          |
|    | M-513   | O-Dealkylation          | 5.45     | [C24H32N4O5S+H] <sup>+</sup>      | 489.2157         | 318.1267 | 188.0527 | 86.0606  | -        | -        |
|    | M-455   | O-Dealkylation          | 5.55     | [C26H34N4O7S+H] <sup>+</sup>      | 547.2211         | 318.1264 | 188.0526 | 86.0605  | 205.0793 | -        |
|    | M-411   | O-Dealkylation          | 5.60     | [C28H38N4O8S+H] <sup>+</sup>      | 591.2471         | 318.1266 | 188.0527 | 86.0606  | 103.0392 | -        |
|    | M-425   | O-Dealkylation          | 5.65     | [C28H40N4O7S+H] <sup>+</sup>      | 577.2681         | 260.1488 | 318.1267 | 188.0526 | 86.0606  | -        |

|           |       |                         |      |                        |          |          |           |          |          |          |
|-----------|-------|-------------------------|------|------------------------|----------|----------|-----------|----------|----------|----------|
|           | M-558 | O-Dealkylation          | 6.38 | [C21H22CIN5O2S+H]+     | 444.1247 | 426.1146 | 383.0721  | 341.0622 | -        | -        |
|           | M-544 | O-Dealkylation-Ox       | 6.41 | [C21H20CIN5O3S+H]+     | 458.1040 | 383.0723 | 341.0622  | 412.0993 | 218.0746 | 75.0236  |
|           | M-470 | O-Dealkylation          | 6.52 | [C25H30CIN5O4S+H]+     | 532.1771 | 341.0611 | 383.0720  | 218.0744 | 289.0555 | -        |
|           | M-456 | O-Dealkylation          | 6.55 | [C25H28CIN5O5S+H]+     | 546.1563 | 341.0618 | 383.0729  | 218.0744 | 75.0235  | -        |
|           | M+16  | Aliphatic Hydroxylation | 6.82 | [C49H60CIN9O9S2+2H]+2  | 509.6889 | 318.1269 | 128.0621  | 357.0568 | 234.0691 | 75.0237  |
|           | M-2   | Dehydrogenation         | 7.43 | [C49H59CIN9O8S+H]+2    | 500.6834 | 318.1267 | 188.0528  | 683.2411 | 618.2902 | -        |
| <b>8</b>  |       |                         | 8.26 |                        |          |          |           |          |          |          |
|           | M-554 | N-Dealkylation          | 6.58 | [C19H18CIN5OS+H]+      | 400.0988 | 383.0728 | 75.0236   | -        | -        | -        |
|           | M+14  | Aliphatic Carbonylation | 6.95 | [C49H60CIN9O6S2]+2     | 484.6885 | 399.0678 | 357.0568  | 202.0683 | 332.1422 | 115.0545 |
|           | M+16  | Aliphatic Hydroxylation | 7.33 | [C49H60CIN9O6S2+H2]+2  | 485.6982 | 639.2521 | 202.0688  | 332.1429 | 234.0700 | -        |
|           | M+16  | Aliphatic Hydroxylation | 7.68 | [C49H60CIN9O6S2+H2]+2  | 485.6979 | 639.2530 | 202.0690  | 332.1426 | 526.1680 | 102.0922 |
|           | M+16  | Aliphatic Hydroxylation | 7.74 | [C49H60CIN9O6S2+H2]+2  | 485.6972 | 639.2546 | 611.2582  | 202.0695 | 526.1682 | -        |
|           | M-2   | Dehydrogenation         | 7.84 | [C49H59CIN9O5S2+H]+2   | 476.6925 | 570.3131 | 202.0695  | 621.2436 | 332.1442 | -        |
| <b>9</b>  |       |                         | 8.11 |                        |          |          |           |          |          |          |
|           | M-640 | Amide Hydrolysis        | 4.80 | [C17H21N3O2S+H]+       | 332.1426 | 202.0686 | 91.0549   | 147.0266 | -        | -        |
|           | M-469 | O-Dealkylation          | 5.72 | [C25H34N4O5S+H]+       | 503.2332 | 332.1433 | 202.0690  | 175.0581 | 147.0266 | -        |
|           | M-425 | O-Dealkylation+Ox       | 5.78 | [C27H38N4O6S+H]+       | 547.2592 | 332.1432 | 202.0688  | 175.0579 | 188.1281 | 216.1231 |
|           | M-411 | O-Dealkylation          | 5.81 | [C27H36N4O7S+H]+       | 561.2386 | 202.0687 | 332.1431  | 175.0582 | 147.0272 | -        |
|           | M-486 | O-Dealkylation          | 6.15 | [C23H24CIN5O3S+H]+     | 486.1367 | 400.1007 | 383.0737  | 341.0639 | -        | -        |
|           | M-471 | O-Dealkylation          | 6.24 | [C25H32N4O5S+H]+       | 501.2172 | 330.1274 | 202.0687  | 175.0578 | 115.0546 | -        |
|           | M-528 | O-Dealkylation+Ox       | 6.40 | [C21H22CIN5O2S+H]+     | 444.1258 | 426.1153 | 383.0729  | 246.0141 | 218.0747 | -        |
|           | M-514 | O-Dealkylation          | 6.41 | [C21H20CIN5O3S+H]+     | 458.1053 | 383.0725 | 412.0988  | 246.0143 | 218.0747 | -        |
|           | M-484 | O-Dealkylation+Ox       | 6.46 | [C23H26CIN5O3S+H]+     | 488.1521 | 383.0737 | 341.0629  | 246.0143 | 218.0751 | -        |
|           | M-572 | N-Dealkylation          | 6.58 | [C19H18CIN5OS+H]+      | 400.0995 | 383.0735 | 75.0237   | -        | -        | -        |
|           | M+14  | Aliphatic Carbonylation | 6.81 | [C48H58CIN9O8S2]+2     | 493.6788 | 202.0689 | 655.2108  | 399.0675 | 357.0560 | -        |
|           | M+16  | Aliphatic Hydroxylation | 7.16 | [C48H58CIN9O8S2+H2]+2  | 494.6844 | 202.0687 | 657.2262  | 629.2318 | 219.0949 | 332.1430 |
|           | M+14  | Aliphatic Carbonylation | 7.57 | [C48H58CIN9O8S2]+2     | 493.6770 | 202.0684 | 332.14301 | 115.0545 | -        | -        |
|           | M-2   | Dehydrogenation         | 7.69 | [C48H57CIN9O7S2+H2]+2  | 485.6794 | 202.0688 | 639.2160  | 332.1432 | 769.2915 | 526.1322 |
| <b>10</b> |       |                         | 8.09 |                        |          |          |           |          |          |          |
|           | M-654 | Amide Hydrolysis        | 4.81 | [C17H21N3O2S+H]+       | 332.1427 | 219.0950 | 131.0863  | 115.0546 | -        | -        |
|           | M-483 | O-Dealkylation          | 5.73 | [C25H34N4O5S+H]+       | 503.2315 | 202.0683 | 141.0698  | 86.0964  | -        | -        |
|           | M-411 | O-Dealkylation          | 5.90 | [C28H38N4O7S+H]+       | 575.2525 | 332.1427 | 216.1230  | 244.1179 | -        | -        |
|           | M-425 | O-Dealkylation          | 5.92 | [C28H40N4O6S+H]+       | 561.2745 | 332.1427 | 202.0686  | 230.1387 | -        | -        |
|           | M-486 | O-Dealkylation          | 6.23 | [C24H26CIN5O3S+H]+     | 500.1250 | 400.0093 | 341.0622  | -        | -        | -        |
|           | M-542 | O-Dealkylation          | 6.39 | [C21H22CIN5O2S+H]+     | 444.1261 | 426.1156 | 102.0471  | 383.0728 | -        | -        |
|           | M-528 | O-Dealkylation          | 6.39 | [C21H20CIN5O3S+H]+     | 458.1039 | 412.0992 | 383.0720  | 300.0337 | -        | -        |
|           | M-586 | N-Dealkylation          | 6.58 | [C19H18CIN5OS+H]+      | 400.0998 | 383.0733 | 341.0622  | -        | -        | -        |
|           | M-470 | O-Dealkylation          | 6.62 | [C24H26CIN5O4S+H]+     | 516.1458 | 383.0729 | 341.0612  | 300.0342 | -        | -        |
|           | M-426 | Amide Hydrolysis        | 6.72 | [C26H30CIN5O5S+H]+     | 560.1735 | 341.0630 | 426.1150  | 218.0746 | -        | -        |
|           | M+16  | Aliphatic Hydroxylation | 7.15 | [C49H60CIN9O8S2+2H]2+  | 501.6932 | 202.0685 | 671.2435  | 399.0689 | 332.1438 | -        |
|           | M+16  | Aliphatic Hydroxylation | 7.59 | [C49H60CIN9O8S2+2H]2+  | 501.6919 | 202.0682 | 671.2400  | 357.0569 | 332.1414 | -        |
|           | M+16  | Aliphatic Hydroxylation | 7.75 | [C49H60CIN9O8S2+2H]2+  | 501.6917 | 400.0990 | 653.2299  | 202.0683 | 332.1421 | -        |
| <b>11</b> |       |                         | 6.39 |                        |          |          |           |          |          |          |
|           | M-498 | N-Dealkylation          | 5.73 | [C23H25CIN6OS+2H]++    | 235.0825 | 97.0106  | -         | -        | -        | -        |
|           | M+16  | Aliphatic Hydroxylation | 5.77 | [C49H59CIN10O6S2+2H]++ | 492.1949 | 782.3201 | 652.2467  | 497.1521 | 202.0685 | 332.1427 |
|           | M+16  | Aliphatic Hydroxylation | 6.09 | [C49H59CIN10O6S2+2H]++ | 492.1949 | 766.3260 | 481.1572  | 383.0721 | 115.0543 | 218.0634 |
| <b>12</b> |       |                         | 8.34 |                        |          |          |           |          |          |          |
|           | M-458 | N-Dealkylation          | 4.19 | [C15H13N3O6+H]+        | 332.0871 | 287.0661 | 75.0237   | -        | -        | -        |
|           | M+16  | Aliphatic Hydroxylation | 7.14 | [C42H40CIN7O8+H]+      | 806.2688 | 332.0582 | 287.0658  | 303.0563 | -        | -        |
|           | M-440 | Amide Hydrolysis        | 7.51 | [C19H12CIN3O2+H]+      | 350.0697 | -        | -         | -        | -        | -        |
| <b>13</b> |       |                         | 8.97 |                        |          |          |           |          |          |          |
|           | M-486 | N-Dealkylation          | 4.17 | [C15H13N3O6+H]+        | 332.0871 | 287.0659 | 75.0236   | -        | -        | -        |

|           |       |                                             |      |                                    |          |          |          |          |          |          |
|-----------|-------|---------------------------------------------|------|------------------------------------|----------|----------|----------|----------|----------|----------|
|           | M-469 | N-Dealkylation                              | 6.75 | [C19H13CIN4O+H] <sup>+</sup>       | 349.0848 | 268.0863 | -        | -        | -        | -        |
|           | M-468 | Amide Hydrolysis                            | 7.51 | [C19H12CIN3O2+H] <sup>+</sup>      | 350.0698 | 269.0940 | 223.0510 | -        | -        | -        |
| <b>14</b> |       |                                             | 7.02 |                                    |          |          |          |          |          |          |
|           | M-462 | O-Dealkylation                              | 4.10 | [C17H17N3O7+H] <sup>+</sup>        | 376.1137 | 358.1033 | 287.0669 | 133.0287 | -        | -        |
|           | M-374 | O-Dealkylation                              | 4.42 | [C21H25N3O9+H] <sup>+</sup>        | 464.1665 | 358.1034 | 287.0662 | 133.0284 | -        | -        |
|           | M-448 | O-Dealkylation+Ox                           | 4.15 | [C17H15N3O8+H] <sup>+</sup>        | 390.0927 | 315.0608 | 287.0670 | 176.0344 | -        | -        |
|           | M-404 | O-Dealkylation+Ox                           | 4.30 | [C19H19N3O9+H] <sup>+</sup>        | 434.1190 | 388.1141 | 315.0618 | 358.1028 | 287.0657 | 176.0237 |
|           | M-360 | O-Dealkylation+Ox                           | 4.46 | [C21H23N3O10+H] <sup>+</sup>       | 478.1454 | 358.1035 | 287.0665 | 176.0346 | -        | -        |
|           | M-445 | O-Dealkylation                              | 6.44 | [C21H17CIN4O2+H] <sup>+</sup>      | 393.1110 | 269.0943 | 304.0633 | 332.0588 | -        | -        |
|           | M-431 | O-Dealkylation+Ox                           | 6.50 | [C21H15CIN4O3+H] <sup>+</sup>      | 407.0898 | 304.0630 | 269.0944 | 332.0578 | -        | -        |
|           | M-401 | O-Dealkylation                              | 6.52 | [C23H21CIN4O3+H] <sup>+</sup>      | 437.1376 | 375.1016 | 269.0948 | 332.0589 | 304.0636 | -        |
|           | M-387 | O-Dealkylation+Ox                           | 6.58 | [C23H19CIN4O4+H] <sup>+</sup>      | 451.1165 | 269.0949 | 304.0640 | 332.0582 | -        | -        |
|           | M-343 | O-Dealkylation+Ox                           | 6.61 | [C25H23CIN4O5+H] <sup>+</sup>      | 495.1421 | 304.0634 | 269.0941 | 332.0579 | 375.0996 | -        |
|           | M+18  | Amide Hydrolysis                            | 6.34 | [C42H42CIN7O11+H] <sup>+</sup>     | 856.2697 | 728.2129 | 375.1009 | 269.0945 | 332.0586 | 304.0634 |
| <b>15</b> |       |                                             | 7.62 |                                    |          |          |          |          |          |          |
|           | M-418 | O-Dealkylation                              | 4.85 | [C15H15N3O5+H] <sup>+</sup>        | 318.1080 | 300.0981 | 207.0764 | 189.0661 | 84.0450  | -        |
|           | M-374 | O-Dealkylation                              | 5.03 | [C17H19N3O6+H] <sup>+</sup>        | 362.1339 | 300.0975 | 251.1024 | 172.0391 | 362.1338 | 189.0658 |
|           | M-360 | O-Dealkylation+Ox                           | 5.12 | [C17H17N3O7+H] <sup>+</sup>        | 376.1142 | 300.0981 | 330.1094 | 265.0822 | 172.0391 | 189.0650 |
|           | M-343 | O-Dealkylation                              | 6.44 | [C21H17CIN4O2+H] <sup>+</sup>      | 393.1104 | 269.0941 | 304.0628 | -        | -        | -        |
|           | M-329 | O-Dealkylation+Ox                           | 6.5  | [C21H15CIN4O3+H] <sup>+</sup>      | 407.0910 | 304.0643 | 269.0949 | -        | -        | -        |
|           | M-285 | O-Dealkylation+Ox                           | 6.57 | [C23H19CIN4O4+H] <sup>+</sup>      | 451.1157 | 269.0941 | 304.0630 | 332.0576 | -        | -        |
|           | M-241 | N-Dealkylation+Ox                           | 6.61 | [C25H23CIN4O5+H] <sup>+</sup>      | 495.1422 | 304.0633 | 269.0943 | 332.0583 | 375.1009 | -        |
|           | M-386 | Amide Hydrolysis                            | 7.51 | [C19H12CIN3O2+H] <sup>+</sup>      | 350.0694 | -        | -        | -        | -        | -        |
| <b>16</b> |       |                                             | 8.86 |                                    |          |          |          |          |          |          |
|           | M-241 | N-Dealkylation                              | 7.29 | [C25H23CIN4O3+H] <sup>+</sup>      | 463.1536 | 269.0951 | 304.0641 | 332.0591 | 179.0607 | -        |
|           | M-354 | Amide Hydrolysis                            | 7.50 | [C19H12CIN3O2+H] <sup>+</sup>      | 350.0700 | 179.0602 | -        | -        | -        | -        |
| <b>17</b> |       |                                             | 8.02 |                                    |          |          |          |          |          |          |
|           | M+30  | Aliphatic Hydroxylation/Alcoholic Oxidation | 7.31 | [C47H49CIN8O7S+H2] <sup>+</sup> +2 | 453.1642 | 202.0686 | 141.0701 | 268.0869 | -        | -        |
|           | M+16  | Aliphatic Hydroxylation                     | 7.40 | [C47H51CIN8O6S+H2] <sup>+</sup> +2 | 446.1750 | 332.1427 | 304.0636 | 202.0685 | 115.0546 | -        |
|           | M+16  | Aromatic Hydroxylation                      | 7.58 | [C47H51CIN8O6S+H2] <sup>+</sup> +2 | 446.1741 | 532.2098 | 202.0684 | 332.1427 | 447.1202 | -        |
|           | M-525 | Amide Hydrolysis                            | 7.51 | [C19H12CIN3O2+H] <sup>+</sup>      | -        | -        | -        | -        | -        | -        |
| <b>18</b> |       |                                             | 8.52 |                                    |          |          |          |          |          |          |
|           | M-554 | N-Dealkylation                              | 6.76 | [C19H13CIN4O+H] <sup>+</sup>       | 303.278  | -        | -        | -        | -        | -        |
|           | M+30  | Aliphatic Hydroxylation/Alcoholic Oxidation | 7.73 | [C49H53CIN8O7S+H2] <sup>+</sup> +2 | 467.1802 | 202.0689 | 304.0637 | 269.0954 | -        | -        |
|           | M-2   | Dehydrogenation                             | 7.96 | [C49H54CIN8O5S+H2] <sup>+</sup> +2 | 451.1849 | 202.0686 | 332.1425 | 570.2274 | 542.2335 | -        |
|           | M+16  | Aromatic Hydroxylation                      | 7.98 | [C49H55CIN8O6S+H2] <sup>+</sup> +2 | 460.1912 | 332.1433 | 202.0689 | 560.2423 | 588.2366 | 475.1549 |
| <b>19</b> |       |                                             | 8.17 |                                    |          |          |          |          |          |          |
|           | M-559 | Amide Hydrolysis                            | 4.81 | [C17H21N3O2S+H] <sup>+</sup>       | 332.1423 | 302.1425 | 91.0548  | 147.0260 | -        | -        |
|           | M-388 | O-Dealkylation                              | 5.72 | [C25H34N4O5S+H] <sup>+</sup>       | 503.2314 | 332.1423 | 202.0683 | 160.0341 | 175.0575 | -        |
|           | M-470 | O-Dealkylation+Ox                           | 6.60 | [C22H17CIN4O3+H] <sup>+</sup>      | 421.1064 | 269.0954 | 332.0581 | 304.0659 | -        | -        |
|           | M-484 | O-Dealkylation                              | 6.66 | [C22H19CIN4O2+H] <sup>+</sup>      | 407.1271 | 269.0949 | 304.0645 | 332.0579 | -        | -        |
|           | M+30  | Aliphatic Hydroxylation/Alcoholic Oxidation | 7.41 | [C47H49CIN8O8S+H2] <sup>+</sup> +2 | 461.1627 | -        | -        | -        | -        | -        |
|           | M+16  | Aliphatic Hydroxylation                     | 7.55 | [C47H51CIN8O7S+H2] <sup>+</sup> +2 | 454.1724 | 576.2029 | 202.0691 | 332.1443 | 175.0580 | 160.0342 |
|           | M+16  | Aromatic Hydroxylation                      | 7.70 | [C47H51CIN8O7S+H2] <sup>+</sup> +2 | 454.1720 | 576.2018 | 548.2061 | 202.0685 | 320.0585 | 405.1110 |
| <b>20</b> |       |                                             | 6.63 |                                    |          |          |          |          |          |          |



|           |       |                                                 |      |                       |           |          |          |          |          |          |
|-----------|-------|-------------------------------------------------|------|-----------------------|-----------|----------|----------|----------|----------|----------|
|           | M+16  | Aliphatic Hydroxylation                         | 5.81 | [C48H52CIN9O6S+2H]++  | 459.6795  | 430.1429 | 332.1427 | 304.0636 | 202.0685 | 160.0341 |
|           | M+16  | Aliphatic Hydroxylation                         | 6.02 | [C48H52CLN9O6S+2H]++  | 459.6797  | 587.2168 | 446.1378 | 332.1427 | 304.0636 | 202.0685 |
|           | M+30  | Aliphatic Hydroxylation/<br>Alcoholic Oxidation | 6.13 | [C48H50CIN9O7S+2H]++  | 466.6695  | 430.1429 | 304.0636 | 269.0947 | 99.0917  | 91.0542  |
|           | M+16  | Aromatic Hydroxylation                          | 6.24 | [C48H52CIN9O6S+2H]++  | 459.6798  | 587.2168 | 446.1378 | 320.0585 | 285.0897 | 202.0685 |
|           | M+16  | Aromatic Hydroxylation                          | 6.33 | [C48H52CIN9O6S+2H]++  | 459.6802  | 332.1427 | 446.1378 | 320.0585 | 332.1427 | 202.0682 |
|           | M-552 | Amide Hydrolysis+Ox                             | 7.40 | [C19H12CIN3O2+H]+     | 350.0690  | 268.0869 | 179.0604 | -        | -        | -        |
| <b>21</b> |       |                                                 | 8.46 |                       |           |          |          |          |          |          |
|           | M-439 | Amide Hydrolysis                                | 3.85 | [C20H19FN4O2+H]+      | 367.1554  | 281.0711 | 208.0545 | -        | -        | -        |
|           | M-241 | N-Dealkylation+Ox                               | 6.86 | [C31H37FN4O5+H]+      | 565.2821  | 547.2725 | 281.0722 | 208.0558 | 253.0772 | -        |
| <b>22</b> |       |                                                 | 8.06 |                       |           |          |          |          |          |          |
|           | M+32  | N-Dealkylation                                  | 6.52 | [C48H57CIN9O7S2+H2]+2 | 519.2519  | 332.1429 | 202.0686 | 281.0723 | 706.3598 | -        |
|           | M+16  | Aliphatic Hydroxylation                         | 7.04 | [C55H69FN8O8S+H2]+2   | 511.2539  | 332.1425 | 202.0684 | 281.0719 | 115.0544 | 86.0607  |
|           | M+16  | Aliphatic Hydroxylation                         | 7.08 | [C55H69FN8O8S+H2]+2   | 511.2544  | 332.1432 | 202.0687 | 281.0724 | 175.0576 | 445.2272 |
|           | M+16  | Aliphatic Hydroxylation                         | 7.20 | [C55H69FN8O8S+H2]+2   | 511.2545  | 332.1424 | 202.0683 | 281.0719 | 367.1559 | 147.0262 |
|           | M+16  | Aliphatic Hydroxylation                         | 7.40 | [C55H69FN8O8S+H2]+2   | 511.2549  | 348.1384 | 281.0728 | 141.0720 | 261.0661 | -        |
|           | M-2   | Dehydrogenation                                 | 7.76 | [C55H68FN8O7S+H2]+2   | 502.2491  | 559.2720 | 332.1428 | 202.0687 | 281.0725 | 253.0773 |
| <b>23</b> |       |                                                 | 7.10 |                       |           |          |          |          |          |          |
|           | M+16  | Aliphatic Hydroxylation                         | 6.56 | [C51H61FN8O8S+H2]+2   | 483.2236  | 332.1429 | 202.0689 | 281.0719 | 503.2087 | -        |
|           | M+16  | Aliphatic Hydroxylation                         | 6.71 | [C51H61FN8O8S+H2]+2   | 483.2236  | 634.3036 | 332.1427 | -        | -        | -        |
|           | M-2   | Dehydrogenation                                 | 6.90 | [C51H61FN8O7S+H]+2    | 474.2183  | 202.0689 | 503.2097 | 616.2950 | 332.1429 | -        |
| <b>24</b> |       |                                                 | 5.57 |                       |           |          |          |          |          |          |
|           | M-607 | N-Dealkylation                                  | 3.73 | [C20H19FN4O2+H]+      | 367.1566  | 281.0721 | 208.0557 | 107.0292 | -        | -        |
|           | M+16  | Aliphatic Hydroxylation                         | 5.28 | [C51H60FN11O7S+H]+    | 990.4461  | 643.3151 | 530.2310 | 115.0542 | 218.0628 | 281.0721 |
|           | M+32  | N-Dealkylation+Ox                               | 5.40 | [C51H60FN11O8S+2H]++  | 503.7235  | 805.3792 | 399.1463 | 332.1427 | 202.0685 | 160.0341 |
|           | M+16  | Aliphatic Hydroxylation                         | 5.64 | [C51H60FN11O7S+2H]++  | 495.7253  | 789.3842 | 383.1514 | 332.1427 | 281.0721 | 202.0685 |
|           | M-334 | N-Dealkylation+Ox                               | 5.74 | [C31H41N7O6S+H]+      | 640.2908  | 332.1427 | 202.0685 | 187.0450 | 175.0576 | 309.1557 |
|           | M-415 | N-Dealkylation+Ox                               | 5.78 | [C28H38N4O6S+H]+      | 559.2583  | 332.1427 | 147.0263 | 115.0542 | 202.0685 | 160.0341 |
|           | M-2   | Dehydrogenation                                 | 6.62 | [C51H59N11O6S+H]+     | 486.7212  | 332.1427 | 613.3045 | 641.2995 | 202.0685 | 253.0772 |
| <b>25</b> |       |                                                 | 6.48 |                       |           |          |          |          |          |          |
|           | M-526 | N-Dealkylation                                  | 5.03 | [C26H26FN7O3+H]+      | 504.2156  | 367.1565 | 281.0721 | 261.0659 | 253.0750 | -        |
|           | M-698 | Amide Hydrolysis                                | 5.78 | [C17H21N3O2S+H]+      | 332.1429  | 202.0685 | 160.0341 | 147.0263 | 115.0542 | -        |
|           | M+32  | N-Dealkylation+Ox                               | 5.93 | [C54H64FN11O9S+2H]++  | 531.7374  | 332.1427 | 202.0685 | 175.0576 | 219.0950 | -        |
|           | M+16  | Aliphatic Hydroxylation                         | 6.11 | [C54H64FN11O8S+H]+    | 1046.4720 | 168.1383 | 333.1921 | 218.0634 | 196.1332 | 543.2636 |
|           | M+16  | Aliphatic Hydroxylation                         | 6.23 | [C54H64FN11O8S+2H]++  | 523.7397  | 715.3362 | 697.3257 | 367.1565 | 332.1424 | 202.0685 |
| <b>26</b> | -     |                                                 | 8.11 |                       |           |          |          |          |          |          |
|           | M-338 | Amide hydrolysis                                | 4.50 | [C23H30N4O6+H]+       | 459.2238  | 287.0672 | 176.0343 | -        | -        | -        |
|           | M-323 | N-Dealkylation+Ox                               | 5.80 | [C23H27N3O8+H]+       | 474.1871  | 287.0658 | 176.0343 | 456.1765 | -        | -        |
|           | M-440 | Amide hydrolysis+Ox                             | 6.65 | [C15H14F2N2O4S+H]+    | 357.0715  | 298.0580 | 154.0225 | 143.0306 | 139.0014 | -        |
|           | M+32  | O-Dealkylation+Ox (Morph)                       | 6.97 | [C38H42F2N2O11S+H]+   | 829.2673  | 313.0461 | 287.0672 | 267.0410 | 253.0250 | -        |
| <b>27</b> |       |                                                 | 6.88 |                       |           |          |          |          |          |          |
|           | M-383 | O-Dealkylation                                  | 4.43 | [C19H19N3O8+H]+       | 418.1245  | -        | -        | -        | -        | -        |
|           | M-403 | O-Dealkylation                                  | 5.54 | [C17H17F2N3O4S+H]+    | 398.0981  | 267.0390 | -        | -        | -        | -        |
|           | M+32  | O-Dealkylation                                  | 5.56 | [C36H38F2N6O+H]+      | 833.2258  | 414.0940 | 371.0507 | 358.1031 | 287.0660 | 267.0397 |

|           |       |                                           |      |                                   |                       |          |          |          |          |          |
|-----------|-------|-------------------------------------------|------|-----------------------------------|-----------------------|----------|----------|----------|----------|----------|
|           | M-359 | O-Dealkylation+Ox                         | 5.62 | [C19H21F23O5S+H] <sup>+</sup>     | 442.1243              | 267.0404 | 184.9869 | 154.0227 | 139.0015 | -        |
|           | M-401 | O-Dealkylation                            | 6.19 | [C17H19F2N3O4S+H] <sup>+</sup>    | 400.1137              | 382.1026 | 139.0012 | 154.0223 | 199.0025 | -        |
|           | M-357 | O-Dealkylation                            | 6.28 | [C19H23F2N3O5S+H] <sup>+</sup>    | 444.1400              | 299.0674 | 241.0221 | 199.0026 | 184.9874 | 139.0013 |
|           | M-343 | O-Dealkylation+Ox                         | 6.31 | [C19H21F2N3O6S+H] <sup>+</sup>    | 458.1198              | 241.0227 | 139.0016 | 199.0029 | 130.0326 | 267.0398 |
|           | M+16  | Aliphatic Hydroxylation                   | 6.33 | [C36H38F2N6O12S+H] <sup>+</sup>   | 817.2305 and 799.2196 | 380.0875 | 358.1034 | 309.0508 | 296.0435 | 176.0344 |
|           | M-444 | Amide Hydrolysis                          | 6.65 | [C15H14F2N2O4S+H] <sup>+</sup>    | 357.0716              | 298.0584 | 154.0227 | 139.0015 | -        | -        |
| <b>28</b> |       |                                           | 6.97 |                                   |                       |          |          |          |          |          |
|           | M-469 | O-Dealkylation                            | 4.13 | [C17H17N3O7+H] <sup>+</sup>       | 376.1139              | 287.0657 | 176.0345 | -        | -        | -        |
|           | M-471 | O-Dealkylation                            | 4.27 | [C17H15N3O7+H] <sup>+</sup>       | 374.0983              | -        | -        | -        | -        | -        |
|           | M-359 | O-Dealkylation                            | 4.47 | [C21H25F2N3O6S+H] <sup>+</sup>    | 486.1505              | -        | -        | -        | -        | -        |
|           | M-447 | O-Dealkylation                            | 5.54 | [C17H17F2N3O4S+H] <sup>+</sup>    | 398.0981              | 154.0228 | -        | -        | -        | -        |
|           | M+32  | O-Dealkylation                            | 5.62 | [C38H42F2N6O14S+H] <sup>+</sup>   | 877.2521              | 414.0930 | 371.0490 | 358.1025 | 343.0558 | 287.0665 |
|           | M-359 | O-Dealkylation                            | 5.71 | [C21H25F2N3O6S+H] <sup>+</sup>    | 486.1505              | 267.0393 | 184.9863 | -        | -        | -        |
|           | M+18  | Amide hydrolysis                          | 6.20 | [C38H44F2N6O13S+H] <sup>+</sup>   | 863.2728              | 735.2151 | 488.1682 | 382.1034 | 358.1040 | 339.0616 |
|           | M-401 | O-Dealkylation                            | 6.27 | [C19H23F2N3O5S+H] <sup>+</sup>    | 444.1399              | 241.0253 | 184.9868 | 199.0035 | 139.0016 | -        |
|           | M-387 | O-Dealkylation                            | 6.29 | [C19H21F2N3O6S+H] <sup>+</sup>    | 458.1192              | 241.0243 | 139.0018 | -        | -        | -        |
|           | M-431 | O-Dealkylation                            | 6.31 | [C17H17F2N3O5S+H] <sup>+</sup>    | 253.0232              | 199.0023 | 139.0015 | 127.0357 | -        | -        |
|           | M-343 | O-Dealkylation                            | 6.36 | [C21H25F2N3O7S+H] <sup>+</sup>    | 502.1454              | 299.0665 | 253.0248 | 241.0244 | 199.0023 | 139.0012 |
|           | M-488 | Amide hydrolysis                          | 6.68 | [C15H14F2N2O4S+H] <sup>+</sup>    | 357.0715              | 169.0338 | 75.0050  | 298.0581 | 154.0227 | 139.0016 |
| <b>29</b> |       |                                           | 5.88 |                                   |                       |          |          |          |          |          |
|           | M-338 | Amide hydrolysis                          | 4.67 | [C19H24N4O4+H] <sup>+</sup>       | 373.1872              | -        | -        | -        | -        | -        |
|           | M-354 | Amide hydrolysis                          | 6.67 | [C15H14F2O4S+H] <sup>+</sup>      | 357.0715              | 298.0581 | 187.0026 | 154.0226 | 139.0230 | -        |
|           | M-241 | Aliphatic Hydroxylation<br>N-Dealkylation | 7.10 | [C21H25F2N3O5S+H] <sup>+</sup>    | 470.1556              | 299.0675 | 241.0217 | 199.0030 | 139.0018 | -        |
|           | M+176 | Glucuronidation                           | 5.15 | [C40H45F2N6O13S+2H] <sup>++</sup> | 444.1400              | 241.0246 | 169.0333 | 139.0015 | 127.0353 | -        |
|           | M+32  | O-Dealkylation                            | 6.98 | [C34H36F2N6O9S+H] <sup>+</sup>    | 743.2305              | 343.0565 | 267.0401 | 241.0248 | 199.0027 | 127.0357 |
|           | M-323 | N-Dealkylation                            | 6.25 | [C19H21N3O6+H] <sup>+</sup>       | 370.1396              | 274.0818 | -        | -        | -        | -        |
|           | M+18  | Amide hydrolysis                          | 7.70 | [C34H38F2N6O8S+H] <sup>+</sup>    | 729.2513              | 311.0662 | 299.0635 | 241.0236 | 130.0321 | 86.0070  |
| <b>30</b> |       |                                           | 9.18 |                                   |                       |          |          |          |          |          |
|           | M-383 | N-Dealkylation                            | 6.48 | [C15H15F2N3O3S+H] <sup>+</sup>    | 356.0875              | 75.0238  | 298.0578 | 154.0229 | 139.0014 | 127.0354 |
|           | M-382 | Amide Hydrolysis+Ox                       | 6.56 | [C15H14F2N2O4S+H] <sup>+</sup>    | 357.0715              | 75.005   | 298.0587 | 187.0022 | 154.0226 | 169.0338 |
|           | M-323 | N-Dealkylation+Ox                         | 6.96 | [C21H25N3O6+H] <sup>+</sup>       | 416.1816              | 398.1716 | 201.0664 | 175.0504 | 84.0452  | -        |
|           | M+16  | Aliphatic Hydroxylation                   | 7.81 | [C36H40F2N6O8S+H] <sup>+</sup>    | 755.2669              | 311.0649 | 240.0288 | 199.0029 | 175.0501 | 154.0230 |
|           | M+32  | O-Dealkylation+Ox (Morph)                 | 7.90 | [C36H40F2N6O9S+H] <sup>+</sup>    | 771.2618              | 313.0453 | 343.0572 | 267.0407 | 253.0249 | 199.0033 |
| <b>31</b> |       |                                           | 7.79 |                                   |                       |          |          |          |          |          |
|           | M-338 | Amide hydrolysis                          | 4.19 | [C19H24N4O6+H] <sup>+</sup>       | 405.1769              | 369.1341 | -        | -        | -        | -        |
|           | M-381 | O-Dealkylation                            | 5.10 | [C17H19N3O6+H] <sup>+</sup>       | 362.1347              | 251.1027 | 300.0982 | 227.0824 | 189.0657 | 172.0392 |
|           | M-367 | O-Dealkylation+Ox                         | 5.15 | [C17H17N3O7+H] <sup>+</sup>       | 376.1139              | 358.1035 | 330.1083 | 265.0823 | 300.0988 | 189.0662 |
|           | M-345 | O-Dealkylation                            | 5.56 | [C17H17F2N3O4S+H] <sup>+</sup>    | 398.0981              | 154.0224 | 139.0015 | -        | -        | -        |
|           | M-301 | O-Dealkylation                            | 5.65 | [C19H21F2N3O5S+H] <sup>+</sup>    | 442.1243              | 139.0013 | -        | -        | -        | -        |
|           | M+32  | O-Dealkylation+Ox (Morph)                 | 6.25 | [C34H36F2N6O11S+H] <sup>+</sup>   | 371.0504              | 343.0565 | -        | -        | -        | -        |
|           | M-285 | O-Dealkylation+Ox                         | 6.34 | [C19H21F2N3O6S+H] <sup>+</sup>    | 458.1192              | 241.0217 | 199.0021 | 139.0013 | 253.0242 | 143.0310 |
|           | M-241 | N-Dealkylation+Ox                         | 6.39 | [C21H25F2N3O7S+H] <sup>+</sup>    | 502.1454              | 199.0030 | 139.0019 | 130.0327 | 299.0664 | 267.0413 |
|           | M-386 | Amide hydrolysis+Ox                       | 6.66 | [C15H14F2N2O4S+H] <sup>+</sup>    | 357.0715              | 298.0603 | 154.0228 | 139.0016 | 143.0308 | 169.0334 |
| <b>32</b> |       |                                           | 8.83 |                                   |                       |          |          |          |          |          |
|           | M-368 | O-Dealkylation                            | 4.86 | [C15H15N3O5+H] <sup>+</sup>       | 318.1088              | 207.0768 | 300.0985 | 172.0395 | 134.0607 | 116.0499 |
|           | M-324 | O-Dealkylation                            | 5.07 | [C17H19N3O6+H] <sup>+</sup>       | 362.1344              | 251.1027 | 300.0980 | 227.0818 | 189.0659 | 172.0394 |
|           | M-310 | O-Dealkylation                            | 5.16 | [C17H17N3O7+H] <sup>+</sup>       | 376.1139              | 358.1036 | 330.1084 | 265.0826 | 300.0982 | 189.0664 |
|           | M-345 | O-Dealkylation                            | 6.44 | [C15H14F2N2O3S+H] <sup>+</sup>    | 341.0766              | 297.0501 | 154.0225 | 143.0304 | 139.0012 | -        |
|           | M-301 | O-Dealkylation                            | 6.54 | [C17H18F2N2O4S+H] <sup>+</sup>    | 385.1027              | 297.0507 | 139.0015 | -        | -        | -        |
|           | M-329 | O-Dealkylation                            | 6.64 | [C15H14F2N2O4S+H] <sup>+</sup>    | 357.0715              | 298.0579 | 187.0030 | 154.0226 | 143.0305 | 139.0018 |
|           | M+32  | O-Dealkylation                            | 6.73 | [C32H33F2N5O10S+H] <sup>+</sup>   | 718.1987              | 227.0814 | 189.0656 | 172.0394 | 144.0446 | 116.0498 |
|           | M-285 | O-Dealkylation                            | 7.34 | [C17H18F2N2O5S+H] <sup>+</sup>    | 401.0980              | 299.0662 | 240.0294 | 154.0228 | 143.0308 | 139.0014 |
|           | M-241 | N-Dealkylation                            | 7.5  | [C19H22F2N2O6S+H] <sup>+</sup>    | 445.1239              | 103.0398 | 139.0018 | 299.0674 | 151.0358 | 130.0321 |
|           | M+18  | Amide Hydrolysis                          | 7.89 | [C32H35F2N5O9S+H] <sup>+</sup>    | 704.2196              | 299.0063 | 227.0821 | 189.0666 | 172.0399 | 116.0499 |
|           | M-2   | Dehydrogenation                           | 8.03 | [C32H31F2N5O8S+H] <sup>+</sup>    | 684.1934              | 297.0509 | 227.0817 | 189.0661 | 172.0395 | 116.0499 |

|           |       |                           |      |                                    |          |          |          |          |          |          |
|-----------|-------|---------------------------|------|------------------------------------|----------|----------|----------|----------|----------|----------|
|           | M-2   | Dehydrogenation           | 9.18 | [C32H31F2N5O8S+H] <sup>+</sup>     | 648.1934 | 297.0517 | 227.082  | 189.0664 | 172.0399 | 116.0502 |
| <b>33</b> |       |                           | 7.96 |                                    |          |          |          |          |          |          |
|           | M-338 | Amide Hydrolysis          | 4.94 | [C28H41N5O4S+H2] <sup>++</sup>     | 272.6512 | -        | -        | -        | -        | -        |
|           | M-525 | Amide Hydrolysis          | 6.63 | [C15H14F2N2O4S+H] <sup>+</sup>     | 357.0715 | -        | -        | -        | -        | -        |
|           | M+32  | O-Dealkylation+Ox (Morph) | 6.58 | [C43H53F2N7O9S2+H2] <sup>++</sup>  | 457.673  | -        | -        | -        | -        | -        |
|           | M+16  | Aliphatic Hydroxylation   | 7.43 | [C43H53F2N7O8S2+H] <sup>+</sup>    | 898.3438 | -        | -        | -        | -        | -        |
| <b>34</b> |       |                           | 7.91 |                                    |          |          |          |          |          |          |
|           | M-338 | Amide Hydrolysis          | 4.98 | [C29H43N5O4S+H2] <sup>++</sup>     | 279.6591 | 264.138  | 166.5751 | 332.1428 | 202.0687 | 141.0917 |
|           | M-564 | Amide Hydrolysis          | 5.91 | [C17H21N3O2S+H] <sup>+</sup>       | 332.1428 | 202.0691 | 91.0546  | -        | -        | -        |
|           | M-337 | N-Dealkylation            | 5.91 | [C28H38N4O6S+H] <sup>+</sup>       | 559.2585 | 332.1428 | 202.0686 | 175.0578 | 131.0861 | -        |
|           | M+32  | O-Dealkylation+Ox (Morph) | 6.4  | [C44H55F2N7O9S2+H2] <sup>++</sup>  | 464.6808 | 727.2936 | 597.2191 | 332.1429 | 202.0685 | 141.0699 |
|           | M-200 | Amide Hydrolysis          | 6.55 | [C32H43F2N5O8S+H] <sup>+</sup>     | 696.2873 | 452.1454 | 311.0659 | 339.0616 | 199.0025 | -        |
|           | M-539 | Amide Hydrolysis          | 6.63 | [C15H14F2N2O4S+H] <sup>+</sup>     | 357.0715 | 298.0588 | 139.0202 | 125.0202 | -        | -        |
|           | M+32  | O-Dealkylation+Ox (Morph) | 6.76 | [C44H55F2N7O9S2+H2] <sup>++</sup>  | 464.6808 | 727.2929 | 597.2195 | 332.1428 | 202.0686 | 141.0699 |
|           | M-526 | N-Dealkylation            | 6.99 | [C16H17F2N3O3S+H] <sup>+</sup>     | 370.1031 | 139.012  | 125.0198 | -        | -        | -        |
|           | M+14  | Aliphatic Carbonylation   | 7.20 | [C44H55F2N7O8S2] <sup>++</sup>     | 455.6755 | 446.6711 | 332.1444 | 202.0685 | 141.0699 | 115.0547 |
|           | M+16  | Aliphatic Hydroxylation   | 7.38 | [C44H55F2N7O8S2+H] <sup>+</sup>    | 912.3594 | 537.2369 | 452.1482 | 339.0617 | 311.0683 | 218.0644 |
|           | M+16  | Aliphatic Hydroxylation   | 7.52 | [C44H55F2N7O8S2+H2] <sup>++</sup>  | 456.6834 | 563.2145 | 447.6786 | 332.1423 | 202.0686 | 115.0546 |
|           | M-14  | N-Dealkylation            | 7.97 | [C43H53F2N7O7S2+H2] <sup>++</sup>  | 441.6781 | 681.29   | 551.2139 | 332.1436 | 202.0687 |          |
| <b>35</b> |       |                           | 8.38 |                                    |          |          |          |          |          |          |
|           | M-323 | N-Dealkylation            | 6.27 | [C30H42N4O6S+H] <sup>+</sup>       | 587.2898 | 202.0687 | 175.058  | 131.0859 | -        | -        |
|           | M-553 | Amide Hydrolysis          | 6.63 | [C15H14F2N2O4S+H] <sup>+</sup>     | 357.0715 | 298.0595 | 187.0038 | 139.0229 | 125.02   | 71.9913  |
|           | M+32  | O-Dealkylation+Ox (Morph) | 6.95 | [C45H57F2N7O9S2+H2] <sup>++</sup>  | 471.6886 | 741.3095 | 611.2361 | 332.1427 | 202.0678 | 141.0702 |
| <b>36</b> |       |                           | 8.02 |                                    |          |          |          |          |          |          |
|           | M-566 | Amide Hydrolysis          | 4.81 | [C17H21N3O2S+H] <sup>+</sup>       | 332.1427 | 202.0687 | 91.0551  | -        | -        | -        |
|           | M-338 | Amide Hydrolysis          | 4.92 | [C28H41N5O5S+H2] <sup>++</sup>     | 280.6487 | 332.1433 | 202.0688 | 141.0704 | 86.0972  | -        |
|           | M-395 | O-Dealkylation            | 5.74 | [C25H34N4O5S+H] <sup>+</sup>       | 503.2323 | 332.143  | 202.0687 | 175.0578 | 141.0701 | -        |
|           | M-470 | O-Dealkylation            | 6.35 | [C18H19F2N3O5S+H] <sup>+</sup>     | 428.1086 | 241.022  | 199.0017 | 139.0016 | 125.0201 | 71.9912  |
|           | M+32  | O-Dealkylation+Ox (Morph) | 6.66 | [C43H53F2N7O10S2+H2] <sup>++</sup> | 465.6704 | 729.2722 | 599.199  | 465.6715 | 202.0687 | 141.0701 |
|           | M+16  | Aliphatic Hydroxylation   | 7.45 | [C43H53F2N7O9S2+H2] <sup>++</sup>  | 457.6730 | 695.2706 | 565.1933 | 448.6696 | 202.0691 | 332.1427 |
| <b>37</b> |       |                           |      |                                    |          |          |          |          |          |          |
|           | M-338 | Amide Hydrolysis          | 4.94 | [C29H43N5O6S+H2] <sup>++</sup>     | 295.654  | 332.1426 | 231.1704 | 202.0684 | 141.0698 | 91.0549  |
|           | M-530 | O-Dealkylation+Ox         | 5.51 | [C17H17F2N3O4S+H] <sup>+</sup>     | 398.0981 | 125.0196 | -        | -        | -        | -        |
|           | M-486 | O-Dealkylation+Ox         | 5.61 | [C19H21F2N3O5S+H] <sup>+</sup>     | 442.1243 | 267.0403 | 184.9865 | 125.0203 | 71.991   | -        |
|           | M-425 | O-Dealkylation            | 5.74 | [C25H34N4O5S+H] <sup>+</sup>       | 503.2323 | 285.1446 | 332.1423 | 202.0683 | 175.0575 | 141.0698 |
|           | M-381 | O-Dealkylation            | 5.77 | [C27H38N4O6S+H] <sup>+</sup>       | 547.2585 | 332.1429 | 202.0686 | 141.0701 | 91.055   | -        |
|           | M-367 | O-Dealkylation+Ox         | 5.82 | [C27H36N4O7S+H] <sup>+</sup>       | 561.2377 | 332.1427 | 202.0685 | 141.0698 | -        | -        |
|           | M-528 | O-Dealkylation            | 6.16 | [C17H19F2N3O4S+H] <sup>+</sup>     | 400.1137 | 143.0302 | 139.0014 | 75.0236  | 71.9909  |          |
|           | M-484 | O-Dealkylation            | 6.24 | [C19H23F2N3O5S+H] <sup>+</sup>     | 444.1399 | 299.0674 | 253.0260 | 241.0220 | 199.0023 | 139.0015 |
|           | M-427 | O-Dealkylation+Ox         | 6.25 | [C25H32N4O5S+H] <sup>+</sup>       | 501.2166 | 330.1268 | 172.0965 | 142.0781 | 202.0683 | 141.0702 |
|           | M-470 | O-Dealkylation+Ox         | 6.27 | [C19H21F2N3O6S+H] <sup>+</sup>     | 458.1192 | 241.0215 | 199.0023 | 139.0011 | 130.0321 | 125.0198 |
|           | M+32  | O-Dealkylation+Ox (Morph) | 6.52 | [C44H55F2N7O11S2+H2] <sup>++</sup> | 480.6757 | 187.0448 | 759.2848 | 629.2091 | 332.1419 | 202.0684 |
|           | M-571 | Amide Hydrolysis          | 6.6  | [C15H14F2N2O4S+H] <sup>+</sup>     | 357.0715 | 75.0047  | 298.058  | 125.0198 | 184.9866 | 139.0228 |

|           |       |                           |      |                       |          |          |          |          |          |          |
|-----------|-------|---------------------------|------|-----------------------|----------|----------|----------|----------|----------|----------|
|           | M+176 | Glucuronidation (OH)      | 7.19 | [C50H64F2N715S2+H2]++ | 552.6969 | 903.3298 | 597.2212 | 508.1758 | 202.0691 | 141.0702 |
|           | M-2   | Dehydrogenation           | 7.35 | [C44H54F2N7O9S2+H2]++ | 463.673  | 725.2774 | 595.2038 | 463.6737 | 332.1432 | 202.0687 |
| <b>38</b> |       |                           | 9.79 |                       |          |          |          |          |          |          |
|           | M+32  | O-Dealkylation+Ox (Morph) | 8.01 | [C44H56F2N6O8S2+H2]++ | 450.1857 | 698.3037 | 568.2289 | 332.1428 | 202.0685 | _        |
|           | M-2   | Dehydrogenation           | 9    | [C44H55F2N6O6S2+H]++  | 433.183  | 297.0513 | 534.2233 | 506.2292 | 332.1429 | 202.0687 |
| <b>39</b> |       |                           | 8.25 |                       |          |          |          |          |          |          |
|           | M-607 | O-Dealkylation            | 5.06 | [C13H12F2N2O2S+H]+    | 299.0661 | 86.0059  | _        | _        | _        | _        |
|           | M-266 | O-Dealkylation+Ox         | 5.74 | [C31H41N7O6S+H]+      | 640.2912 | 439.2300 | 332.1427 | 202.0685 | 168.1383 | 115.0542 |
|           | M+32  | O-Dealkylation+Ox (Morph) | 6.64 | [C44H53F2N9O8S+2H]++  | 469.6787 | 607.2145 | 332.1427 | 219.0950 | 202.0685 | 115.0542 |
|           | M+32  | N-Dealkylation+Ox (Morph) | 7.08 | [C44H53F2N9O8S+2H]++  | 469.6788 | 607.2145 | 494.1304 | 332.1427 | 219.0950 | 202.0685 |
|           | M-426 | Amide Hydrolysis+Ox       | 7.22 | [C21H23F2N5O4S+H]+    | 480.1512 | _        | _        | _        | _        | _        |
|           | M-2   | Dehydrogenation           | 7.64 | [C44H52F2N9O6S2+H]++  | 452.6759 | 573.2090 | 545.2141 | 332.1427 | 297.0504 | 202.0685 |
| <b>40</b> |       |                           | 8.04 |                       |          |          |          |          |          |          |
|           | M-323 | N-Dealkylation            | 5.98 | [C34H46FN5O7S+H]+     | 688.3175 | 115.0545 | 489.2162 | 228.0474 | 202.0683 | 172.113  |
|           | M-655 | N-Dealkylation            | 6.51 | [C15H15F2N3O3S+H]+    | 356.0875 | 240.0283 | 166.996  | 143.0299 | 125.0198 | 298.0568 |
|           | M-654 | Amide Hydrolysis          | 6.59 | [C15H14F2N2O4S+H]+    | 357.0715 | 298.0576 | 240.0290 | 166.9963 | 139.0230 | 125.0200 |
|           | M+32  | O-Dealkylation            | 6.68 | [C49H61F3N8O10S2+H2]+ | 522.2025 | 422.6524 | 202.0686 | 712.1133 | 141.0700 | 115.0546 |
|           | M-2   | Dehydrogenation           | 7.46 | [C49H60F3N8O8S2+H2]++ | 505.1997 | 405.6499 | 267.0399 | 202.0687 | 680.2171 | 712.1134 |
|           | M+16  | Aliphatic Hydroxylation   | 7.53 | [C49H61F3N8O9S2+H2]++ | 514.205  | 356.0875 | 158.0974 | 414.6546 | 202.0684 | _        |
| <b>41</b> |       |                           | 4.80 |                       |          |          |          |          |          |          |
|           | M+18  | Amide Hydrolysis          | 2.69 | [C13H13N3O5+H]+       | 292.0928 | 201.0656 | _        | _        | _        | _        |
|           | M+18  | Amide Hydrolysis          | 2.82 | [C13H13N3O5+H]+       | 292.0928 | 201.0657 | 164.0337 | 129.0660 | 84.0452  | _        |
|           | M+18  | Amide Hydrolysis          | 3.65 | [C13H13N3O5+H]+       | 292.0928 | 247.0714 | 229.0604 | 201.0656 | 163.0540 | _        |
|           | M+18  | Amide Hydrolysis          | 3.73 | [C13H13N3O5+H]+       | 292.0928 | 274.0811 | 246.0867 | 229.0603 | 201.0655 | 163.0497 |
| <b>42</b> |       |                           | 4.72 |                       |          |          |          |          |          |          |
|           | M-227 | N-Dealkylation            | 3.24 | [C12H11NOS+H]+        | 218.0634 | 115.0545 | _        | _        | _        | _        |
|           | M+16  | Aromatic Hydroxylation    | 4.35 | [C23H32N4O4S+H]+      | 461.2217 | 348.1374 | 218.0635 | 115.0548 | _        | _        |
|           | M+16  | Aliphatic Hydroxylation   | 5.21 | [C23H32N4O4S+H]+      | 461.2217 | 332.1426 | 243.1348 | 202.0686 | 141.0698 | 115.0547 |
|           | M+14  | Aliphatic Carbonylation   | 5.97 | [C23H30N4O4S+H]+      | 459.2061 | 245.0735 | 217.0800 | 202.0688 | 147.0269 | 115.0548 |
|           | M-227 | N-Dealkylation            | 6.71 | [C12H11NOS+H]+        | 218.0634 | 147.0265 | 115.0545 | _        | _        | _        |
| <b>43</b> |       |                           | 6.95 |                       |          |          |          |          |          |          |
|           | M+16  | Aliphatic Hydroxylation   | 5.68 | [C19H17CIN4O3S+H]+    | 417.0783 | 399.0674 | _        | _        | _        | _        |
| <b>44</b> |       |                           | 7.50 |                       |          |          |          |          |          |          |
|           | M+16  | Anilinic Hydroxylation    | 5.79 | [C19H12CIN3O3+H]+     | 366.064  | 330.0882 | _        | _        | _        | _        |
|           | M+176 | Glucuronidation           | 5.94 | [C25H20CIN3O8+H]+     | 526.1012 | 350.0694 | 314.0927 | 508.0910 | 304.0637 | 223.0503 |
|           | M+176 | Glucuronidation           | 5.98 | [C25H21CIN3O8]+       | 526.1012 | 304.0633 | 350.0698 | 314.0921 | 223.0500 | 195.0552 |
| <b>45</b> |       |                           | 3.85 |                       |          |          |          |          |          |          |
|           | M+16  | Aliphatic Hydroxylation   | 4.56 | [C20H19FN4O3+H]+      | 385.1516 | 281.0727 | 208.0561 | 130.0289 | 233.0711 | _        |
| <b>46</b> |       |                           | 8.50 |                       |          |          |          |          |          |          |
|           | M+176 | Glucuronidation (OH)      | 5.07 | [C19H20F2N2O8S+H]+    | 475.0981 | 299.0660 | 255.0400 | 166.9962 | 139.0013 | 130.0323 |
|           | M+16  | Aliphatic Hydroxylation   | 6.32 | [C13H12F2N2O3S+H]+    | 315.0609 | 154.9967 | 141.0151 | 130.0328 | 114.0282 | 101.0205 |
|           | M+32  | O-Dealkylation            | 6.42 | [C13H12F2N2O4S+H]+    | 331.0559 | 285.0501 | 312.0446 | 166.9958 | 154.0227 | 125.0203 |
|           | M+32  | O-Dealkylation            | 6.94 | [C13H12F2N2O4S+H]+    | 331.0559 | 166.9959 | 125.0196 | 115.0356 | _        | _        |

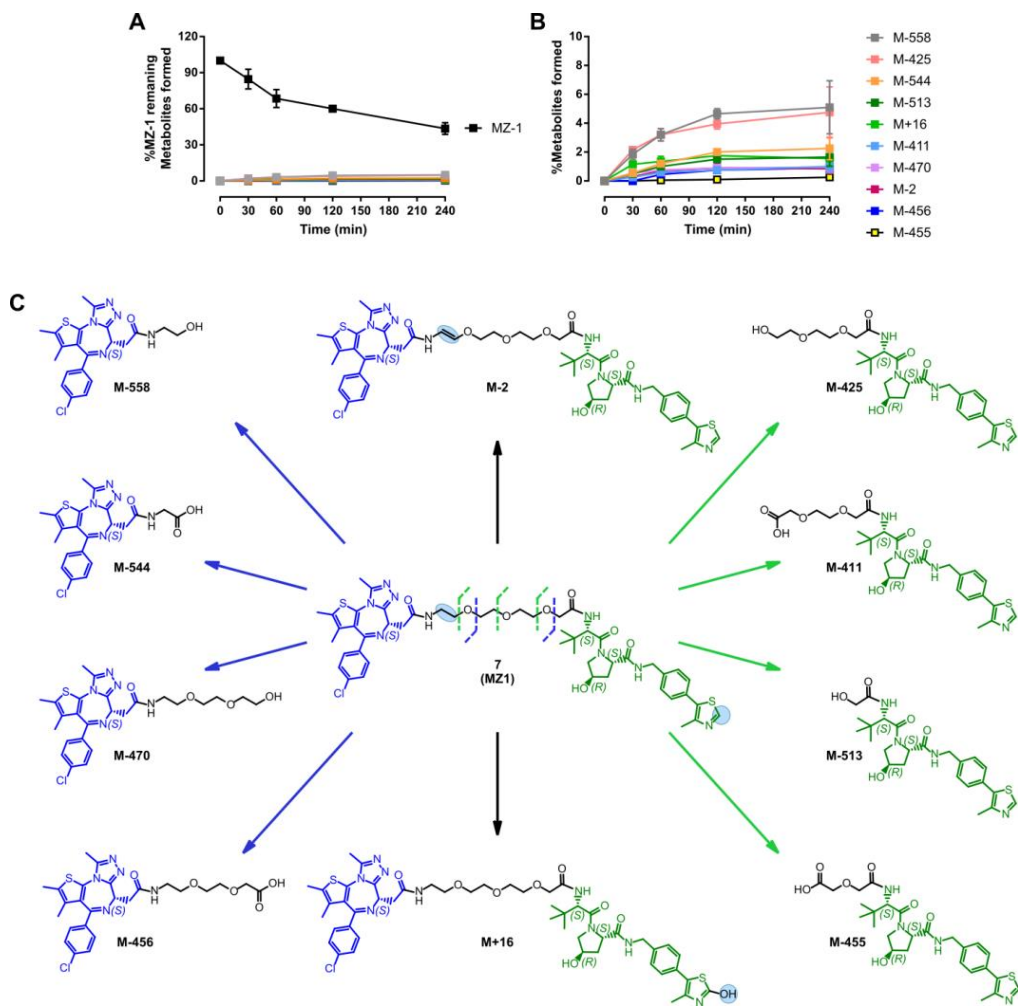

**Figure S1.** Metabolic profile for compound 7 (**MZ1**). A) Observed behavior for substrate degradation is shown in black; B) formation of metabolites, whose names are expressed referring to the mass variation compared to the one of substrate. Data were acquired in triplicate and standard deviation is provided; C) chemical structures of identified metabolites.

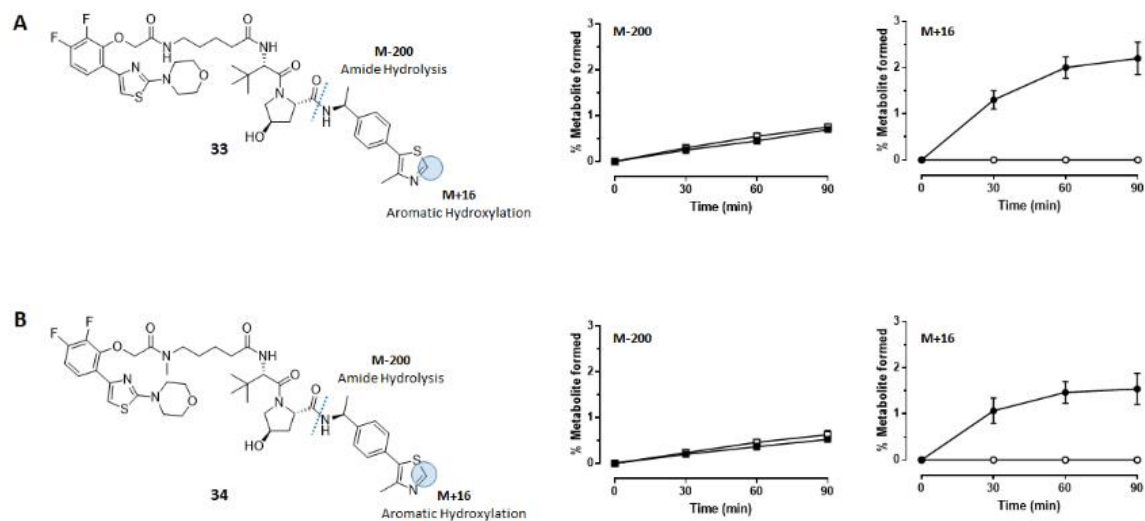

**Figure S2.** Kinetics of the metabolism of compounds **33** and **34** in human liver cytosol. Concerning the chemical structures, bond cleavages are illustrated as dotted lines, while blue circles indicate the atom subjected to oxidation. In the kinetic plots, the behavior of the hydrolyzed metabolite (M-200) is shown as squares, while the hydroxylated metabolite (M+16) is shown as circles. Filled or empty points refers to measures conducted in the absence or in the presence of hydralazine as *hAOX* inhibitor.

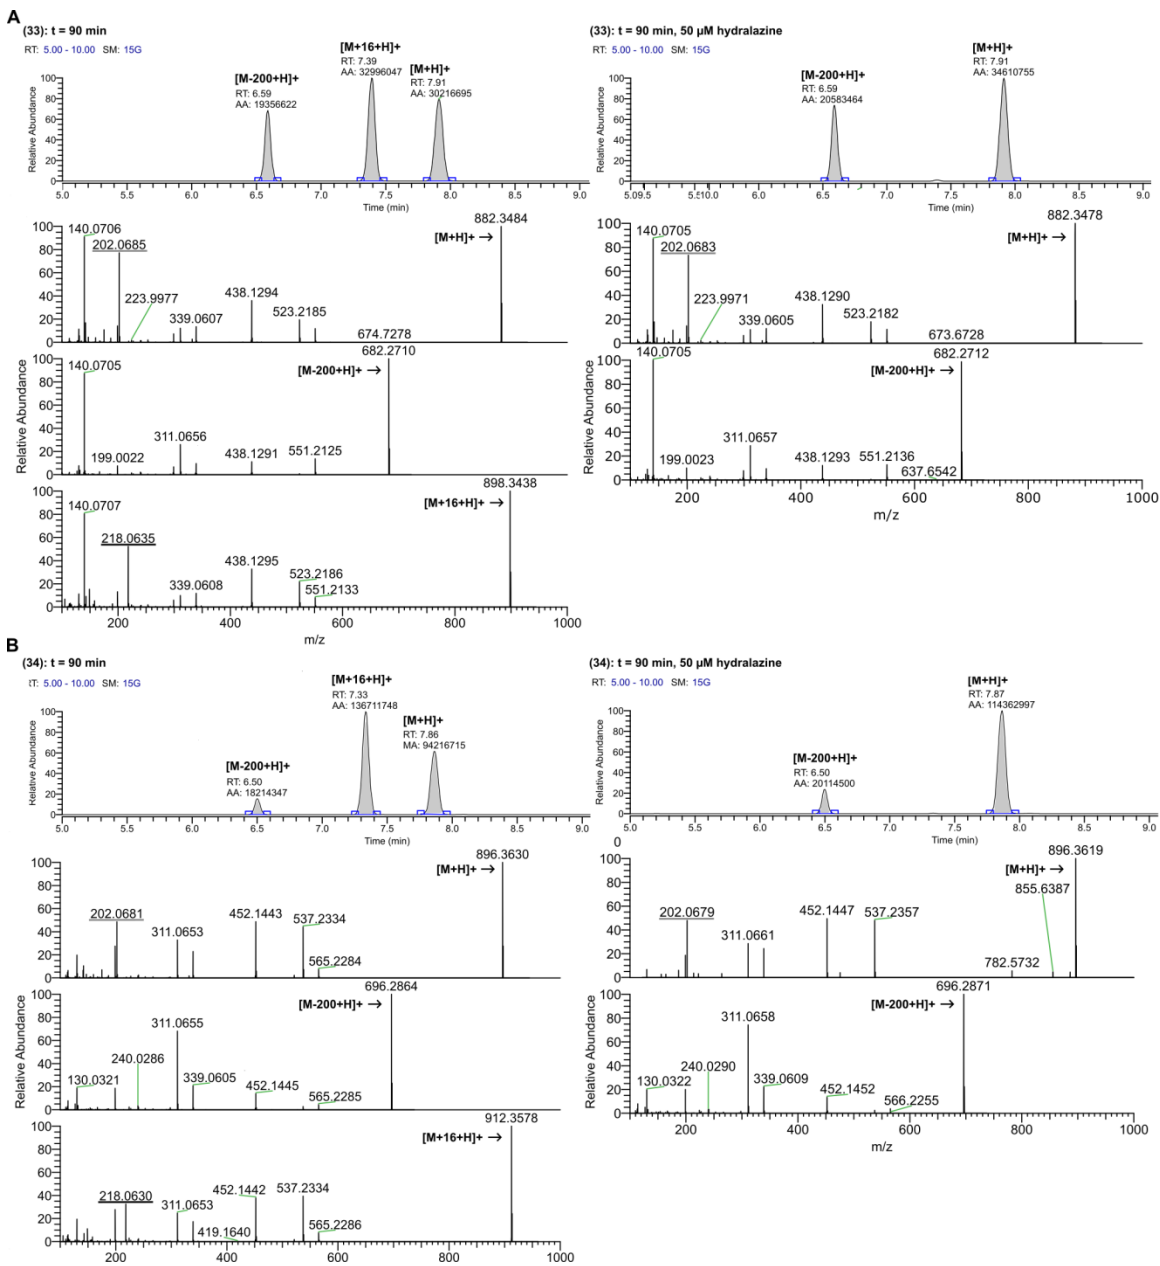

**Figure S3.** Chromatogram of **33** (A) and **34** (B) after 90 min incubation in human liver cytosol in the absence (left) and in the presence of hydralazine (50  $\mu$ M) (right); the MS/MS spectra of the  $[M+H]^+$ ,  $[M-200+H]^+$  and  $[M+16+H]^+$  ions are reported with a mass tolerance of 5 ppm for the base peak.
